# Supplementary material for: Pressure-swing absorption and desorption behaviours of ammonia in bis(trifluoromethylsulfonyl)amide salts
Source: Royal Society of Chemistry journal article supplement (doi:10.1039/d4se00820k), 2024-01-01
Supplement: d4se00820k1.pdf [file d4se00820k1.pdf]

## Supporting Information

### Pressure-Swing Absorption and Desorption Behaviours of Ammonia in Bis(trifluoromethylsulfonyl)amide Salts

Manabu Tokushige, Ryota Fujisawa, and Junichi Ryu\*

*Graduate School of Engineering, Chiba University,  
Chiba 263-8522 Japan*

**\*Corresponding author:**

**Junichi Ryu**

*Graduate School of Engineering, Chiba University*

*Chiba 263-8522 Japan*

E-mail: jryu@chiba-u.jp (Junichi Ryu)

Tel: +81-43-290-3128

## Kinetic analysis

The least-squares fitting results are shown in Figures S1 and S2.

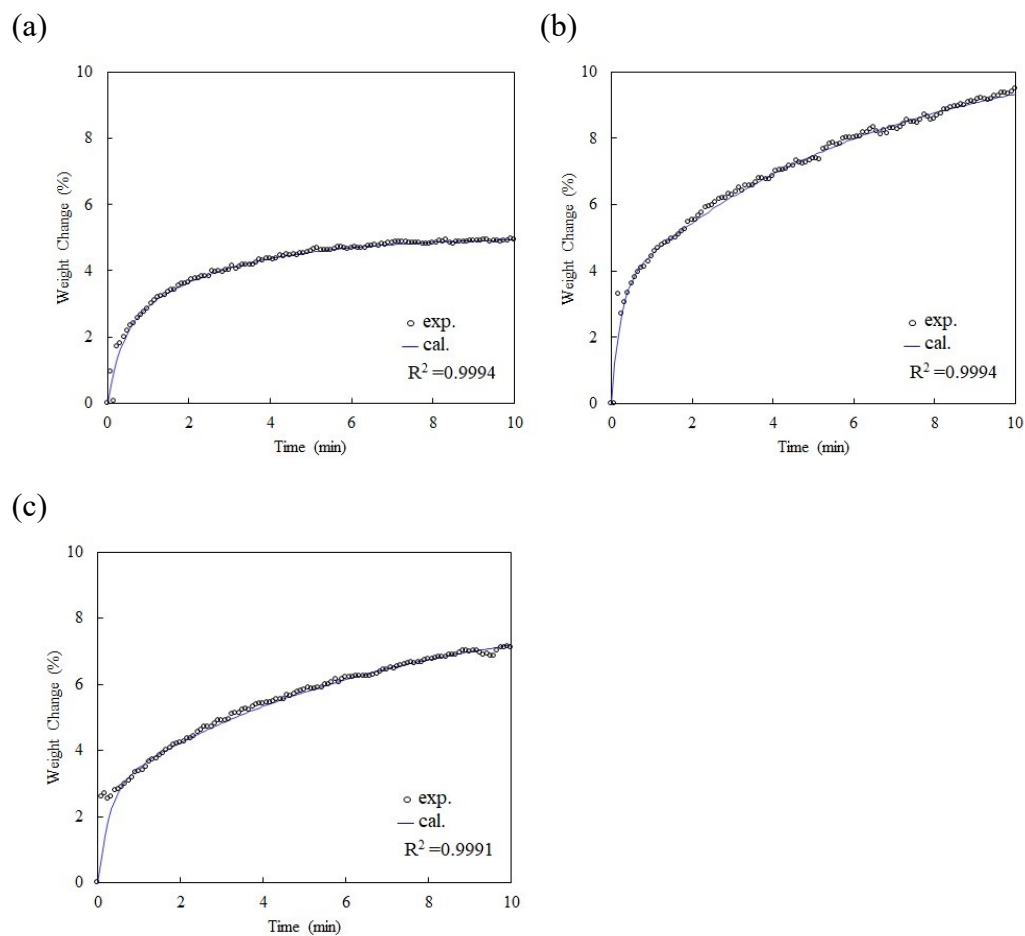

**Fig. S1** Reaction kinetics analysis using the double exponential model for the initial stages of NH<sub>3</sub> absorption by TFSA salts at 473 K: (a) Na[TFSA], (b) Mg[TFSA]<sub>2</sub>, and (c) Ca[TFSA]<sub>2</sub>

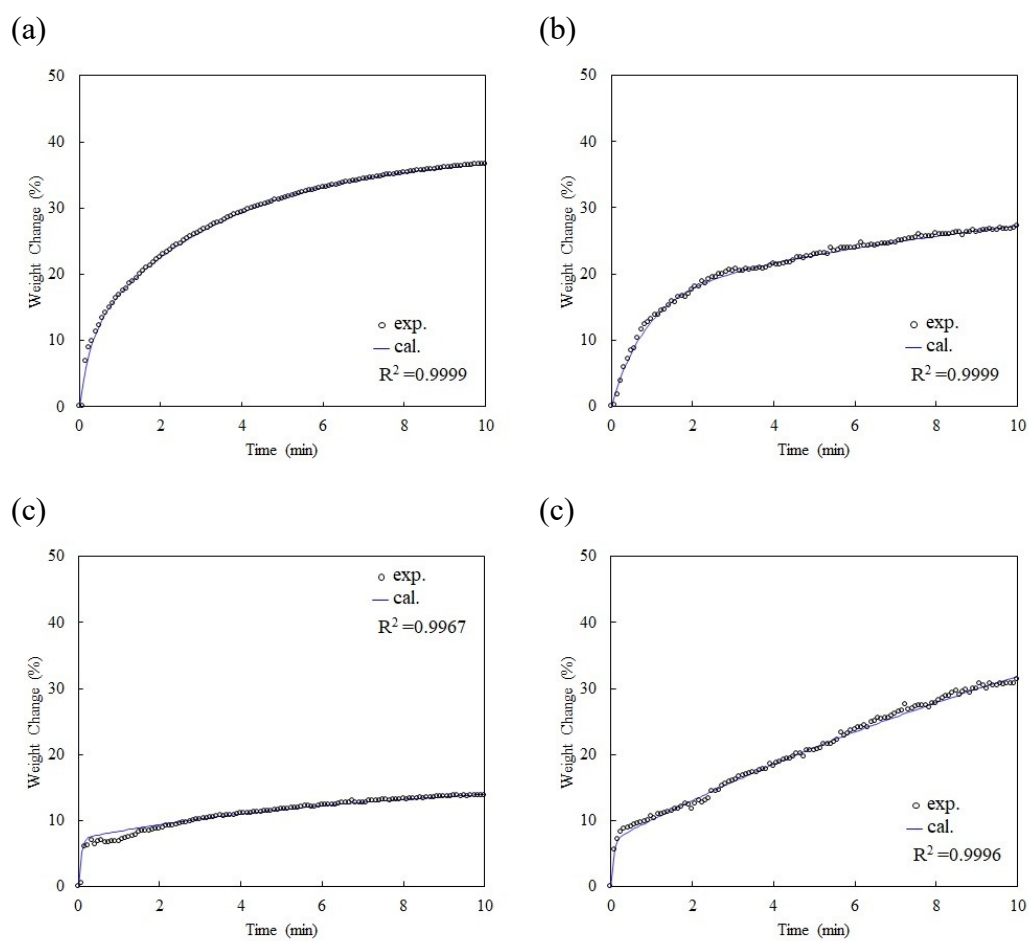

**Fig. S2** Reaction kinetics analysis using the double exponential model for the initial stages of  $\text{NH}_3$  absorption by TFSA salts at 300 K: (a)  $\text{Na}[\text{TFSA}]$ , (b)  $\text{K}[\text{TFSA}]$ , (c)  $\text{Mg}[\text{TFSA}]_2$ , and (d)  $\text{Ca}[\text{TFSA}]_2$

## Zeolite

The adsorption and desorption behaviors of  $\text{NH}_3$  on zeolites are shown in Figures S3.

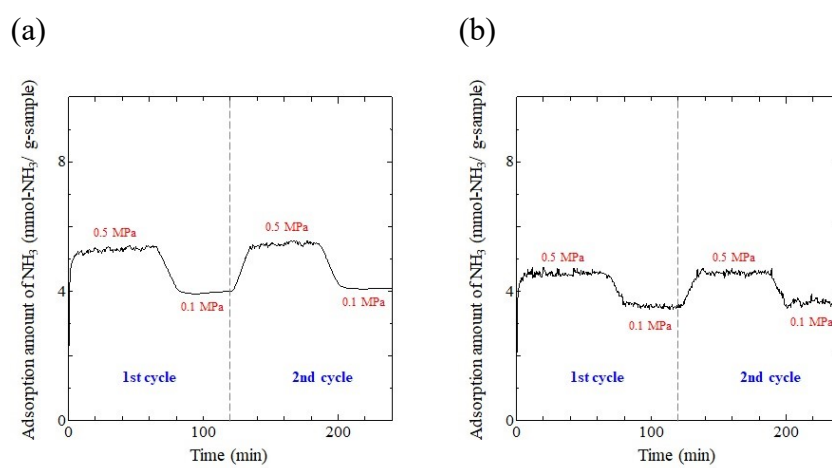

**Fig. S3** Typical  $\text{NH}_3$  adsorption/desorption cycles on zeolites at 473 K:  
(a) Na-Y and (b) A-4
